# Supplementary material
Source: MDPI journal article supplement (https://www.mdpi.com/2673-4605/6/1/17)
Supplement: s1 [file s1]

# Throwing power of embedded anodes for galvanic cathodic protection of steel in concrete

dr. ir. Bjorn Van Belleghem

dr. ir. Mathias Maes, dr. ir. Tim Soetens

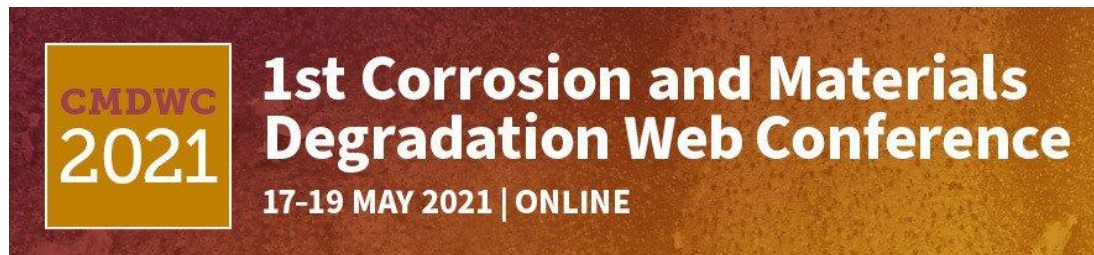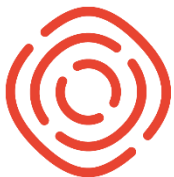

**SANACON**  
FOR HEALTHY CONCRETE STRUCTURES

Ghent University Spin-off  
**MAGNEL-VANDEPITTE LABORATORY**  
FOR STRUCTURAL ENGINEERING AND BUILDING MATERIALS

# Main durability problem of concrete structures: reinforcement corrosion

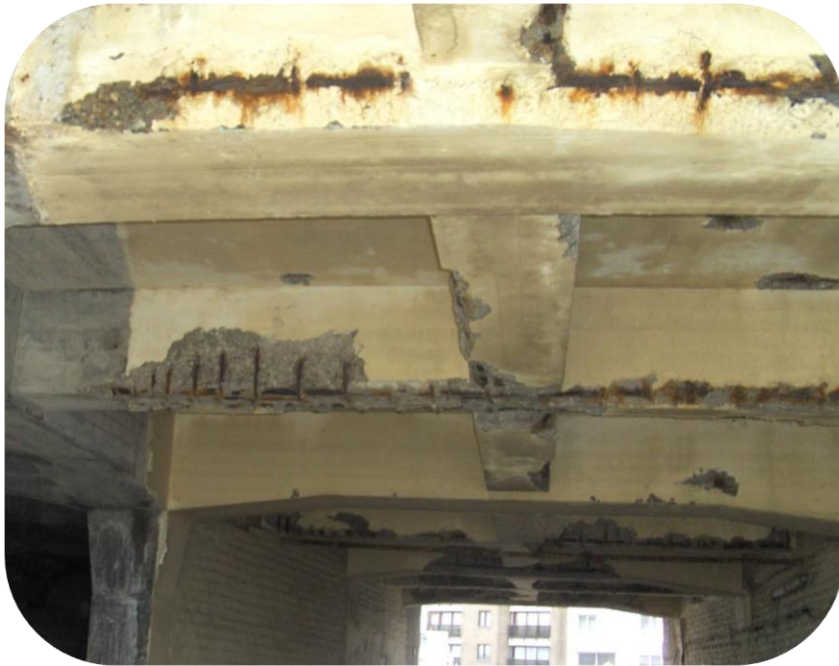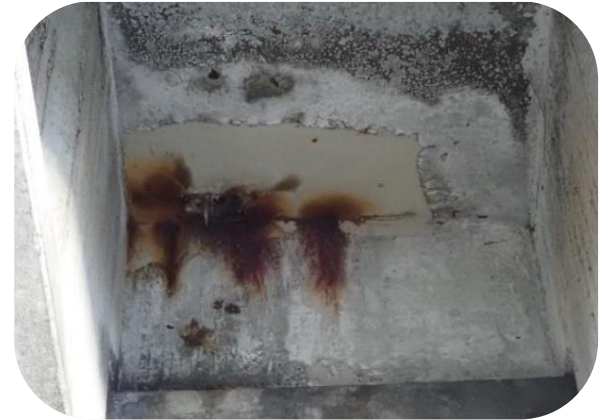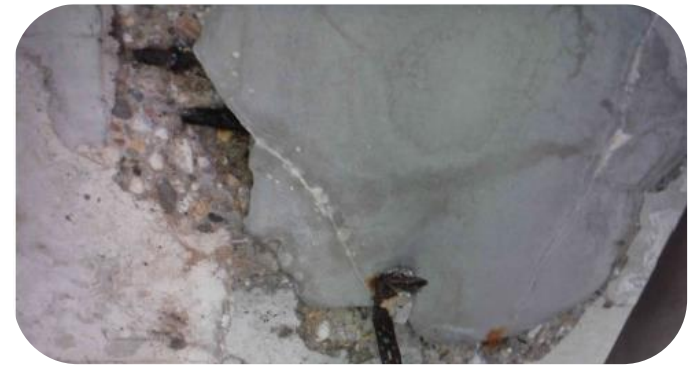

Difficult to obtain **durable concrete repair** by traditional method (i.e. patch repair) due to incipient anode effects and difficulties in identifying all chloride contaminated concrete

# Galvanic Cathodic Protection (GCP) as repair method

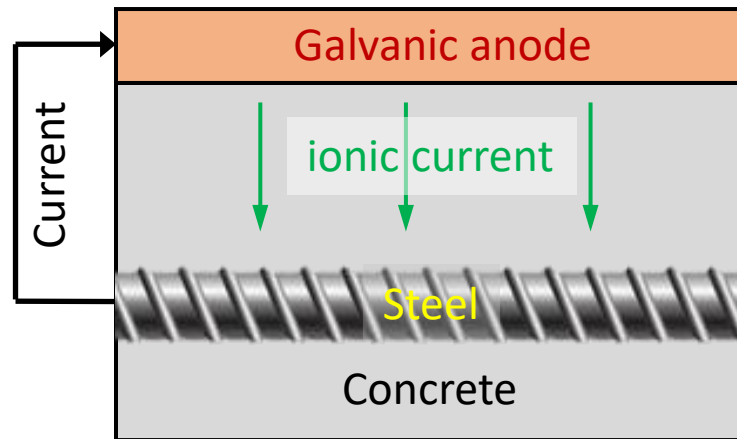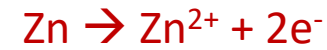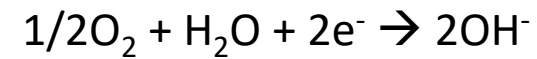

## Discrete embedded anode: GalvaShield CC

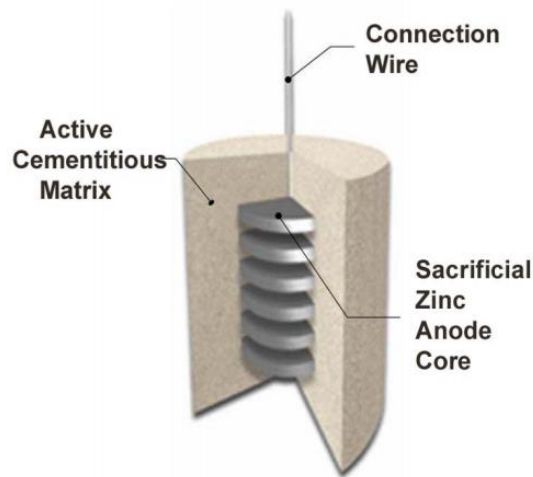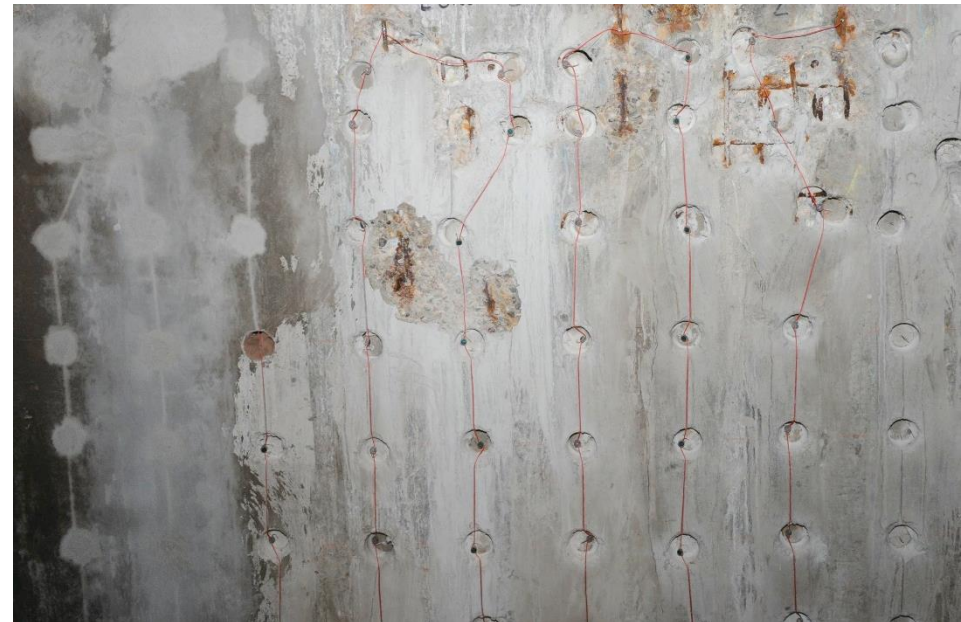

# Design of a GCP system with discrete anodes

Required amount of zinc

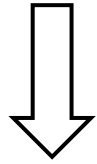

Determined by

- ⊙ Reinforcement density
- ⊙ Estimated galvanic current during intended service life

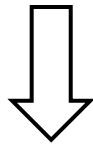

Determines **type** of anode to be used (i.e. mass of zinc core)

Throwing power of the anode

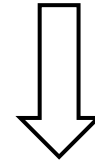

Influenced by

- ⊙ Reinforcement density
- ⊙ Concrete resistance
- ⊙ Corrosion activity

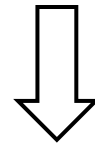

Determines **maximum spacing** between anodes = amount of anodes to be installed

# Throwing power (TP) of discrete galvanic anodes

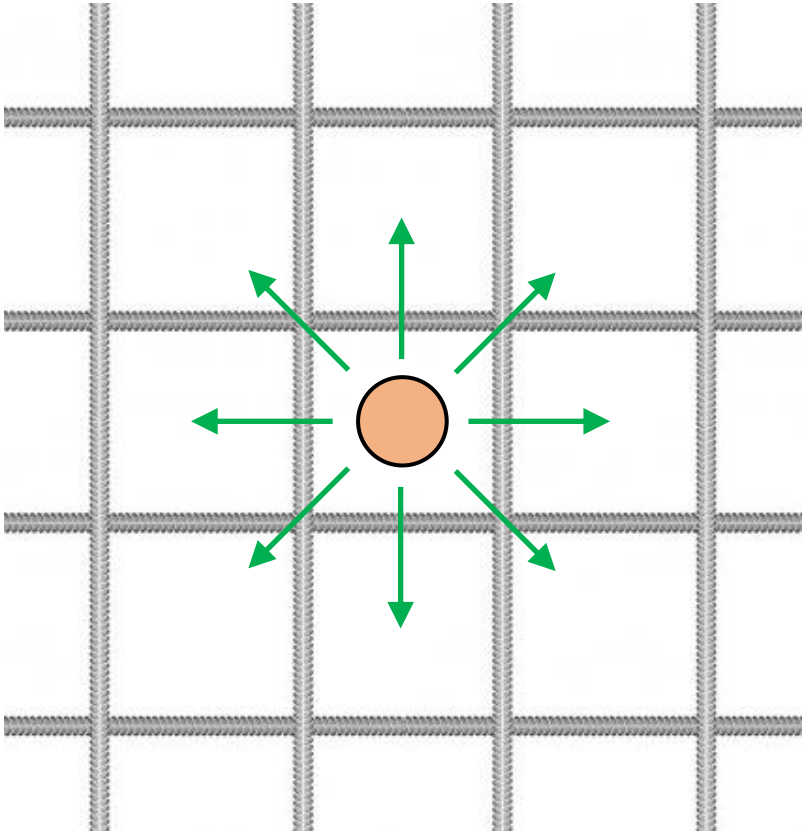

- ③ Method for determination of throwing power (TP)
- ③ Effect of chloride content in concrete on TP
- ③ Influence of environmental conditions on TP



# Concrete specimens

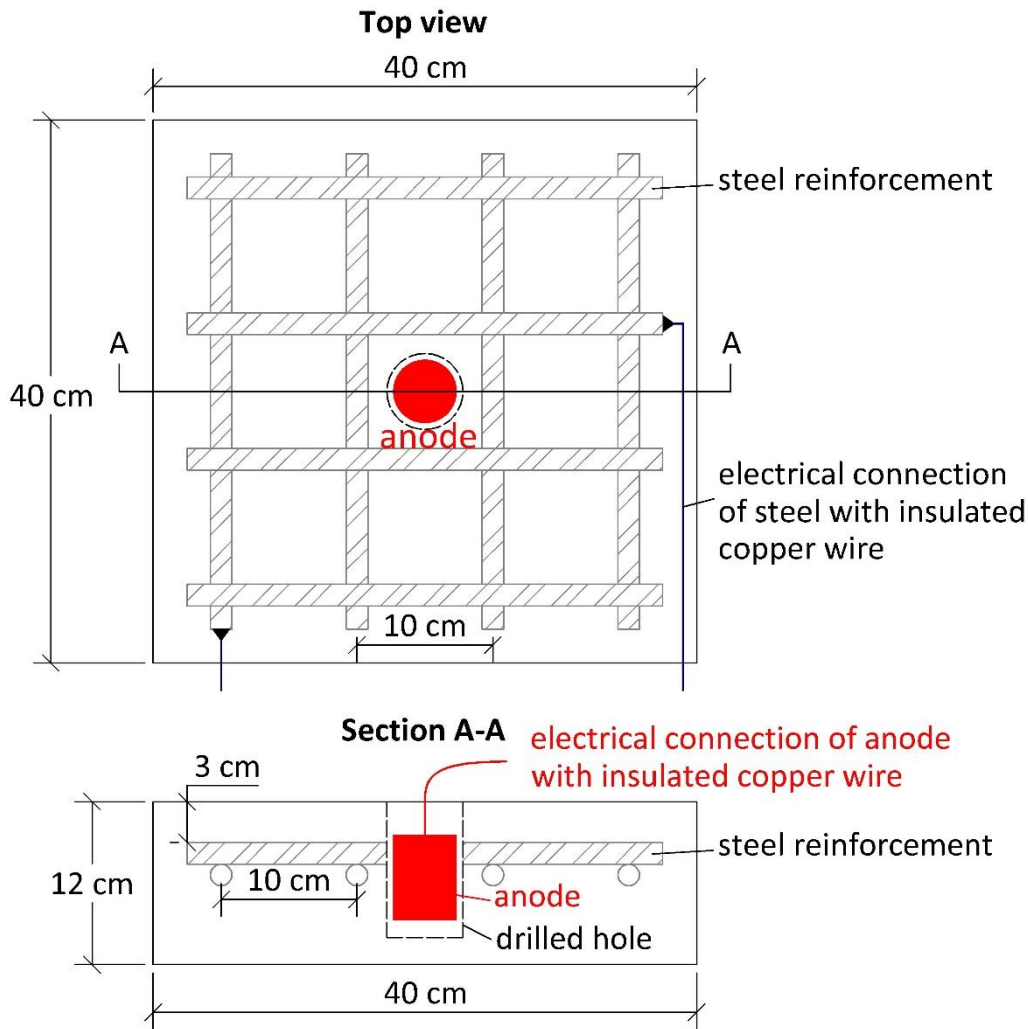

- Concrete slabs  
(400 x 400 x 120 mm)
  - Mesh  $\phi 16$  mm  $\leftrightarrow$  100 mm =  
1 m<sup>2</sup> steel / m<sup>2</sup> concrete
  - Anode installed in the center  
of the slab
- 4 concrete mixes** with different  
amount of mixed-in chlorides
- 0 m% NaCl / cement mass
  - 0,5 m% NaCl / cement mass
  - 1 m% NaCl / cement mass
  - 2 m% NaCl / cement mass

# Determination of throwing power

THROWING POWER = distance from anode where 100 mV depolarization in 24 hours is obtained

24-hour depolarization is determined by means of potential mappings with an external Cu/CuSO<sub>4</sub> electrode

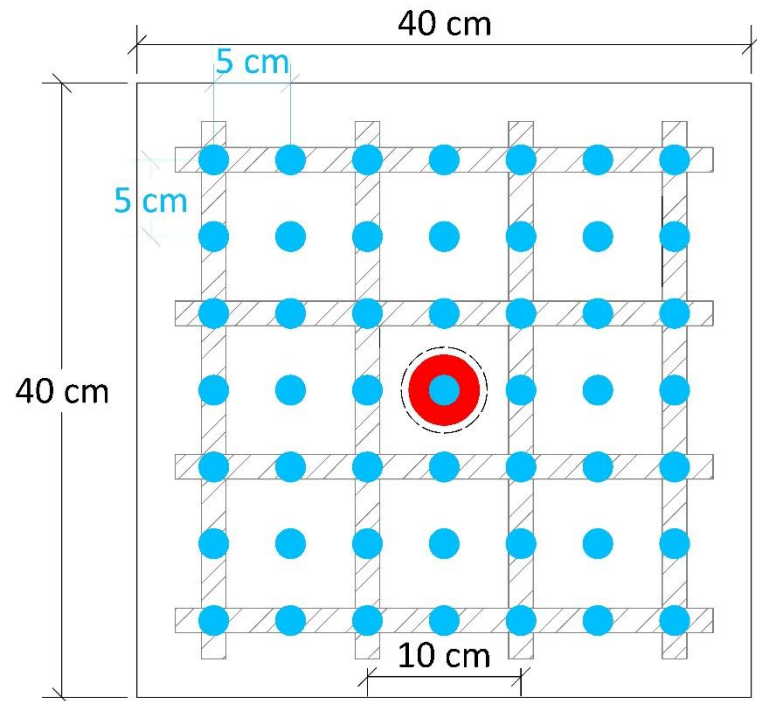

- ⊙ Before start of depolarization = **'ON'** potential
- ⊙ 4 hours after start of depolarization = **'4h OFF'** potential
- ⊙ 24 hours after start of depolarization = **'24h OFF'** potential

# Example result of potential mappings

**'ON' potential**

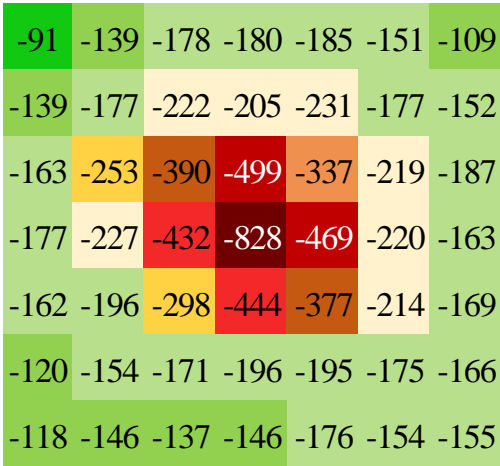

**'4h OFF' potential**

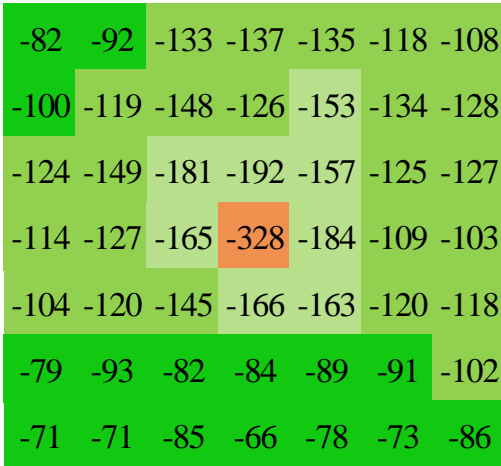

**'24h OFF' potential**

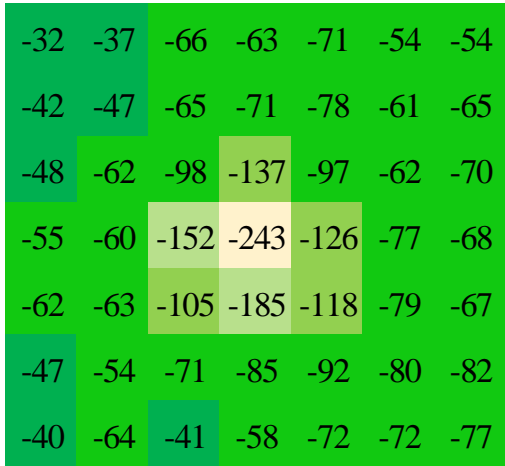

Potential values in mV vs Cu/CuSO<sub>4</sub>

**4h depolarization**

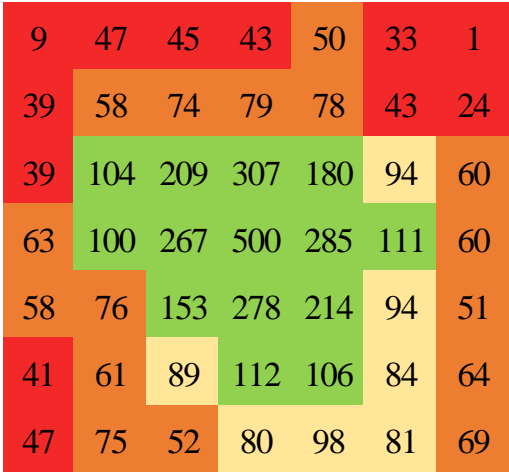

**24h depolarization**

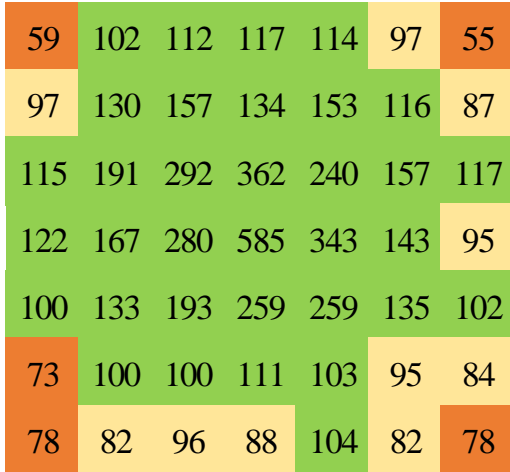

| Depolarization | Color code |
|----------------|------------|
| < 50 mV        | Red        |
| 50 mV – 80 mV  | Orange     |
| 80 mV – 100 mV | Yellow     |
| > 100 mV       | Green      |



# Example of depolarization results

(a) 0 m% NaCl

| 4h depolarization |     |     |     |     |     |     | 24h depolarization |     |     |     |     |     |     |
|-------------------|-----|-----|-----|-----|-----|-----|--------------------|-----|-----|-----|-----|-----|-----|
| 92                | 110 | 135 | 116 | 108 | 122 | 103 | 143                | 156 | 172 | 157 | 157 | 140 | 142 |
| 98                | 122 | 153 | 155 | 128 | 118 | 84  | 143                | 164 | 183 | 207 | 178 | 159 | 100 |
| 82                | 120 | 224 | 296 | 223 | 120 | 73  | 155                | 211 | 330 | 358 | 283 | 169 | 137 |
| 87                | 133 | 319 | 549 | 317 | 131 | 93  | 131                | 170 | 351 | 634 | 368 | 184 | 121 |
| 85                | 117 | 245 | 284 | 218 | 111 | 82  | 148                | 191 | 289 | 341 | 298 | 190 | 148 |
| 78                | 86  | 108 | 269 | 101 | 81  | 42  | 123                | 148 | 174 | 198 | 174 | 155 | 114 |
| 65                | 71  | 94  | 89  | 80  | 39  | 38  | 109                | 123 | 148 | 135 | 139 | 110 | 89  |

(c) 1 m% NaCl

| 4h depolarization |     |     |     |     |     |     | 24h depolarization |     |     |     |     |     |     |
|-------------------|-----|-----|-----|-----|-----|-----|--------------------|-----|-----|-----|-----|-----|-----|
| 10                | 27  | 28  | 42  | 34  | 20  | 8   | 20                 | 46  | 60  | 61  | 60  | 49  | 21  |
| 33                | 65  | 88  | 160 | 120 | 65  | 17  | 54                 | 60  | 102 | 159 | 142 | 78  | 38  |
| 40                | 73  | 191 | 301 | 210 | 110 | 54  | 45                 | 109 | 207 | 305 | 224 | 108 | 1   |
| 64                | 121 | 237 | 488 | 371 | 190 | 94  | 59                 | 130 | 233 | 482 | 383 | 208 | 87  |
| 81                | 106 | 171 | 245 | 205 | 126 | 116 | 75                 | 125 | 184 | 200 | 220 | 127 | 111 |
| 21                | 59  | 90  | 125 | 122 | 100 | 71  | 38                 | 89  | 106 | 150 | 138 | 107 | 100 |
| 39                | 39  | 22  | 74  | 63  | 58  | 29  | 52                 | 65  | 55  | 82  | 83  | 67  | 51  |

(b) 0.5 m% NaCl

| 4h depolarization |     |     |     |     |     |    | 24h depolarization |     |     |     |     |     |     |
|-------------------|-----|-----|-----|-----|-----|----|--------------------|-----|-----|-----|-----|-----|-----|
| 9                 | 47  | 45  | 43  | 50  | 33  | 1  | 59                 | 102 | 112 | 117 | 114 | 97  | 55  |
| 39                | 58  | 74  | 79  | 78  | 43  | 24 | 97                 | 130 | 157 | 134 | 153 | 116 | 87  |
| 39                | 104 | 209 | 307 | 180 | 94  | 60 | 115                | 191 | 292 | 362 | 240 | 157 | 117 |
| 63                | 100 | 267 | 500 | 285 | 111 | 60 | 122                | 167 | 280 | 585 | 343 | 143 | 95  |
| 58                | 76  | 153 | 278 | 214 | 94  | 51 | 100                | 133 | 193 | 259 | 259 | 135 | 102 |
| 41                | 61  | 89  | 112 | 106 | 84  | 64 | 73                 | 100 | 100 | 111 | 103 | 95  | 84  |
| 47                | 75  | 52  | 80  | 98  | 81  | 69 | 78                 | 82  | 96  | 88  | 104 | 82  | 78  |

(d) 2 m% NaCl

| 4h depolarization |     |     |     |     |    |     | 24h depolarization |    |     |     |     |    |    |
|-------------------|-----|-----|-----|-----|----|-----|--------------------|----|-----|-----|-----|----|----|
| -23               | -15 | -2  | 9   | 18  | 4  | -4  | -5                 | -4 | 19  | 32  | 46  | 21 | 18 |
| 6                 | 27  | 58  | 59  | 43  | 11 | 20  | 7                  | 33 | 74  | 72  | 59  | 28 | 25 |
| 26                | 54  | 131 | 221 | 131 | 47 | 30  | 24                 | 55 | 143 | 236 | 153 | 61 | 38 |
| 15                | 70  | 226 | 449 | 187 | 65 | 21  | 18                 | 77 | 212 | 465 | 197 | 76 | 10 |
| 18                | 61  | 141 | 252 | 140 | 58 | 39  | 18                 | 63 | 139 | 264 | 150 | 72 | 45 |
| 27                | 42  | 45  | 44  | 30  | -2 | 24  | 22                 | 47 | 40  | 56  | 47  | 28 | 11 |
| -3                | 3   | 4   | 24  | 26  | 6  | -24 | 10                 | 25 | 10  | 34  | 35  | 19 | 5  |

Depolarization is lower when chloride content in the concrete is higher

# 24h depolarization vs. distance from anode

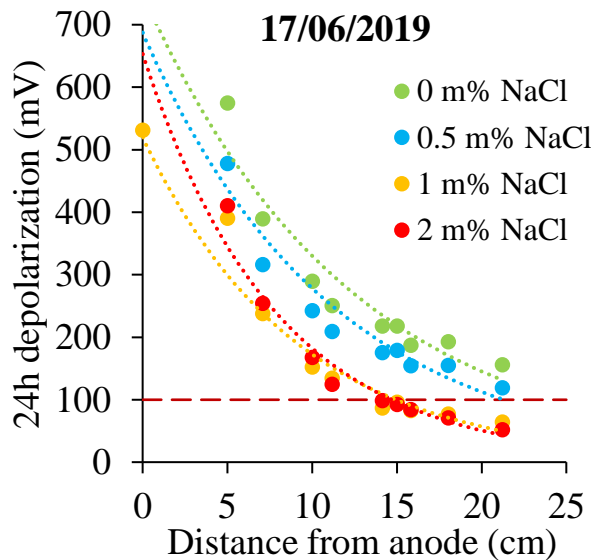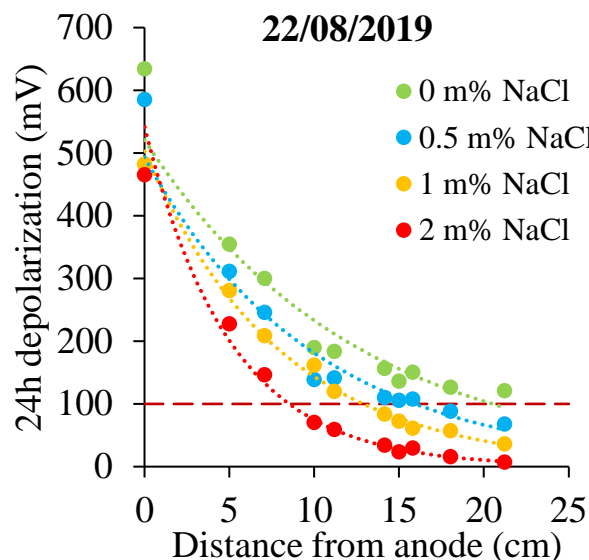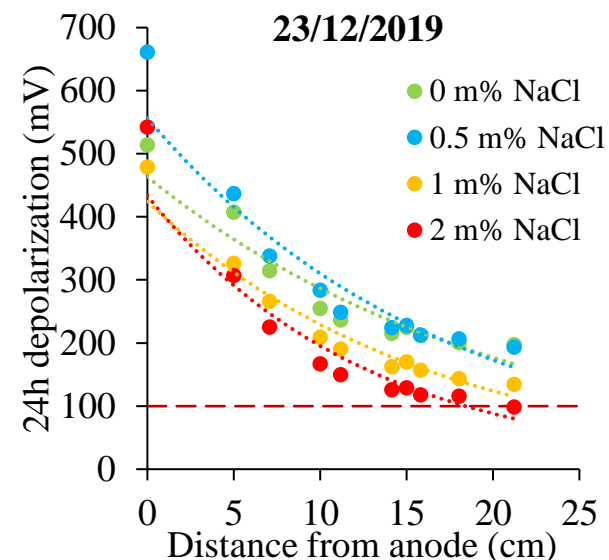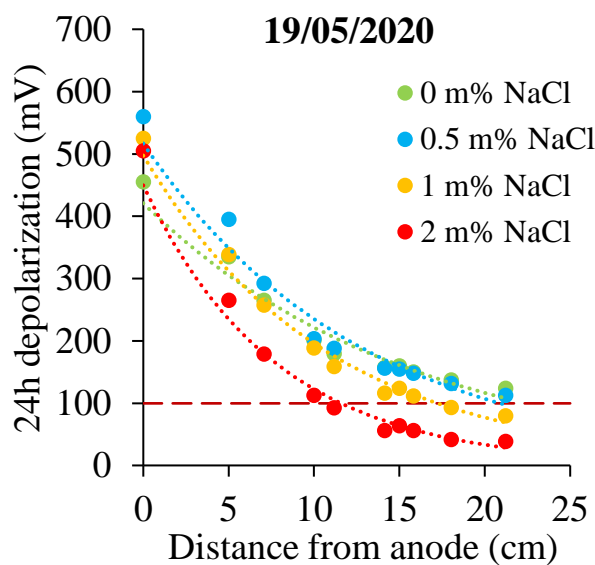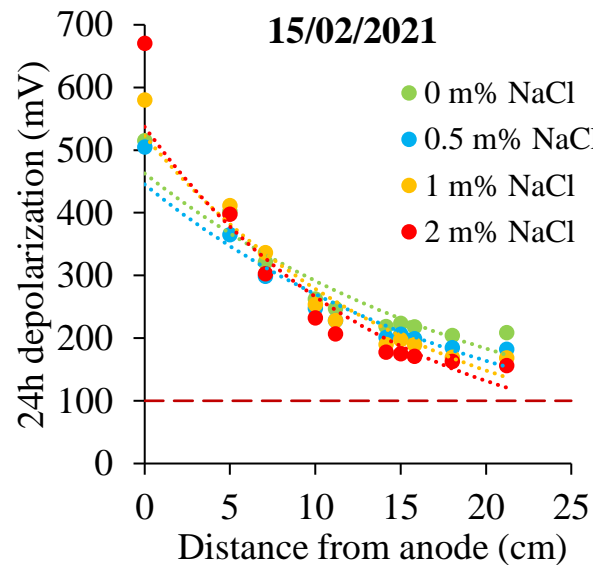

# Influence of environmental conditions on TP

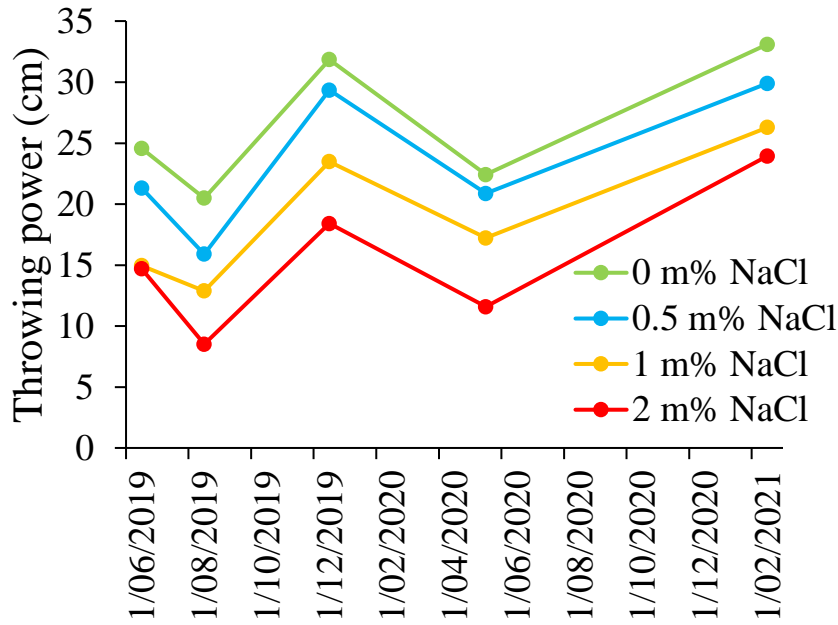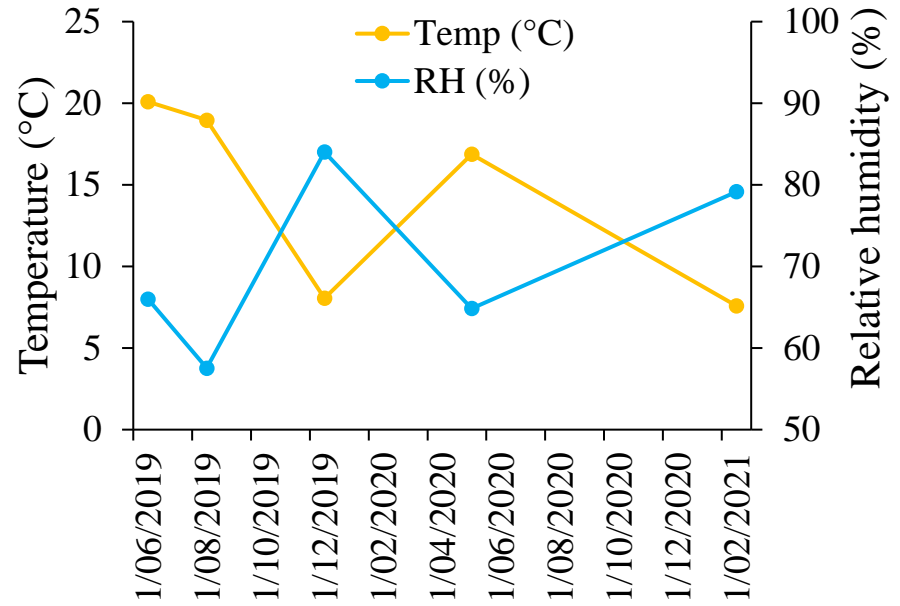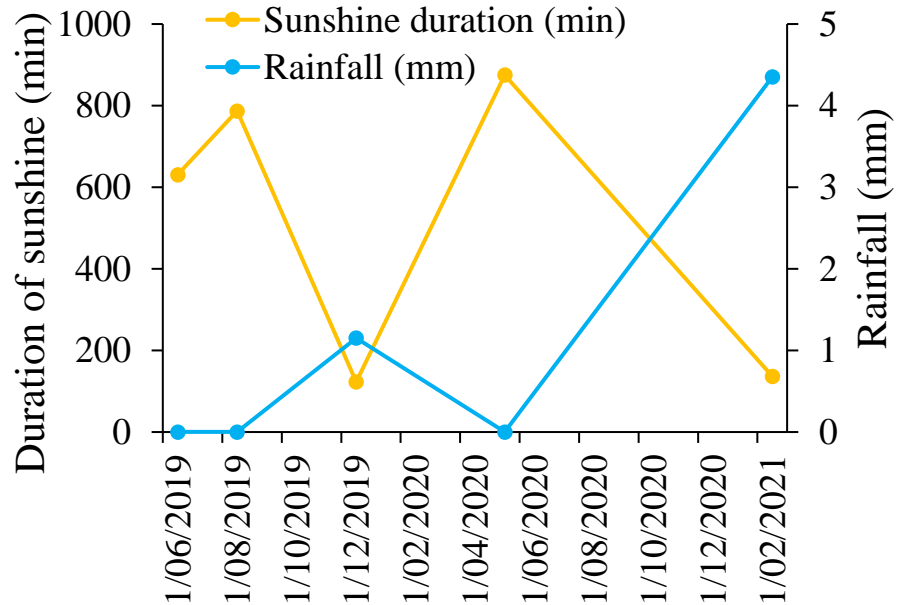

☉ TP ↘ as Cl<sup>-</sup> content ↗

☉ TP ↗ as Temp ↘ and RH ↗

☉ TP ↗ when rainfall ↗

# Throwing power (TP) of discrete galvanic anodes

- ⊙ Potential mappings around discrete anodes during depolarization allows a detailed determination of TP
- ⊙ **Throwing power decreases with increasing chloride content,** making the technique more suitable/economical for corrosion prevention than for stopping ongoing corrosion at high chloride concentrations
- ⊙ **Throwing power varies with environmental conditions** within a range of:
  - 20 – 33 cm (no chlorides in concrete mix)
  - 8.5 – 24 cm (2 m% NaCl by cement mass added)
  - TP is highest in periods with rainfall, high RH (> 80%) and low temperature (< 15°C)

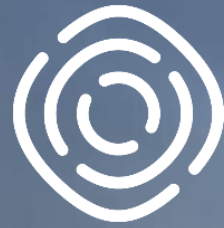

SANA CON

FOR HEALTHY CONCRETE STRUCTURES

[bjorn.vanbelleghem@sanacon.be](mailto:bjorn.vanbelleghem@sanacon.be)

[info@sanacon.be](mailto:info@sanacon.be)

[www.sanacon.be](http://www.sanacon.be)
